RESEARCH ARTICLE

# Norovirus Recombinant Strains Isolated from Gastroenteritis Outbreaks in Southern Brazil, 2004–2011

Tulio Machado Fumian<sup>\*†</sup>, Juliana da Silva Ribeiro de Andrade<sup>‡</sup>, José Paulo Gagliardi Leite, Marize Pereira Miagostovich

Laboratory of Comparative and Environmental Virology, Oswaldo Cruz Institute, Oswaldo Cruz Foundation, Rio de Janeiro, Brazil

† These authors contributed equally to this work.

\* [tuliofmf@ioc.fiocruz.br](mailto:tuliofmf@ioc.fiocruz.br)

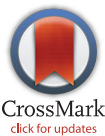

**OPEN ACCESS**

**Citation:** Fumian TM, da Silva Ribeiro de Andrade J, Leite JPG, Miagostovich MP (2016) Norovirus Recombinant Strains Isolated from Gastroenteritis Outbreaks in Southern Brazil, 2004–2011. PLoS ONE 11(4): e0145391. doi:10.1371/journal.pone.0145391

**Editor:** Shamala Devi Sekaran, University of Malaya, MALAYSIA

**Received:** August 13, 2015

**Accepted:** December 3, 2015

**Published:** April 26, 2016

**Copyright:** © 2016 Fumian et al. This is an open access article distributed under the terms of the [Creative Commons Attribution License](http://creativecommons.org/licenses/by/4.0/), which permits unrestricted use, distribution, and reproduction in any medium, provided the original author and source are credited.

**Data Availability Statement:** The nucleotide sequences obtained in this study were submitted to the National Center for Biotechnology Information (GenBank, <http://www.ncbi.nlm.nih.gov/>) and received the following accession numbers: KR074148 - KR074191.

**Funding:** This work was funded by Excellence Program of Research (PROEP-CNPq/IOC) and General Coordination of Laboratories/Secretary of Health Surveillance, Ministry of Health. MP Miagostovich and JPG Leite are CNPq fellows. The funders had no role in study design, data collection

## Abstract

Noroviruses are recognized as one of the leading causes of viral acute gastroenteritis, responsible for almost 50% of acute gastroenteritis outbreaks worldwide. The positive single-strand RNA genome of noroviruses presents a high mutation rate and these viruses are constantly evolving by nucleotide mutation and genome recombination. Norovirus recombinant strains have been detected as causing acute gastroenteritis outbreaks in several countries. However, in Brazil, only one report of a norovirus recombinant strain (GII.P7/GII.20) has been described in the northern region so far. For this study, 38 norovirus strains representative of outbreaks, 11 GII.4 and 27 non-GII.4, were randomly selected and amplified at the ORF1/ORF2 junction. Genetic recombination was identified by constructing phylogenetic trees of the polymerase and capsid genes, and further SimPlot and Bootscan analysis of the ORF1/ORF2 overlap. Sequence analysis revealed that 23 out of 27 (85%) non-GII.4 noroviruses were recombinant strains, characterized as: GII.P7/GII.6 (n = 9); GIIP.g/GII.12 (n = 4); GII.P16/GII.3 (n = 4); GII.Pe/GII.17 (n = 2); GII.P7/GII.14 (n = 1); GII.P13/GII.17 (n = 1); GII.P21/GII.3 (n = 1); and GII.P21/GII.13 (n = 1). On the other hand, among the GII.4 variants analyzed (Den Haag\_2006b and New Orleans\_2009) no recombination was observed. These data revealed the great diversity of norovirus recombinant strains associated with outbreaks, and describe for the first time these recombinant types circulating in Brazil. Our results obtained in southern Brazil corroborate the previous report for the northern region, demonstrating that norovirus recombinant strains are circulating more frequently than we expected. In addition, these results emphasize the relevance of including ORF1/ORF2-based analysis in surveillance studies as well as the importance of characterizing strains from other Brazilian regions to obtain epidemiological data for norovirus recombinant strains circulating in the country.

and analysis, decision to publish, or preparation of the manuscript.

**Competing Interests:** The authors have declared that no competing interests exist.

## Introduction

Noroviruses (NoV) are members of the *Caliciviridae* family, and is now recognized as one of the leading causes of acute gastroenteritis (AGE), responsible for almost 50% of AGE outbreaks worldwide [1,2]. NoV are primarily associated with outbreaks of AGE in semi-closed settings such as elderly care facilities, hospitals, cruise ships and childcare centers [2,3]. These epidemics have occurred globally since the mid-1990s with increasing frequency [4,5]. Consequently, NoV-associated AGE has become a major public health concern for which there is no available anti-viral agent or preventative vaccine yet available.

NoV present a positive-polarity RNA genome of approximately 7500 nucleotides (nt) in length, presenting a high mutation rate and high genetic variability; it is organized as three open reading frames (ORFs), with ORF1 and ORF2 overlapping by about 20 nt [6,7]. ORF1 encodes non-structural proteins including RNA-dependent RNA polymerase (RdRp). ORF2 encodes a major capsid protein (VP1) that contains an N-terminal arm, a shell or S-domain and a protrusion or P-domain, and ORF3 encodes a minor capsid protein (VP2); both proteins are translated from subgenomic RNA [8]. NoV have been classified into six genogroups (GI to GVI) based on VP1 amino acid sequence [9]. Each genogroup can be further divided into genotypes, and at least 36 genotypes are recognized to date [10–12]. NoV are in constant evolution, with new strains frequently arising due to nucleotide point mutation (antigenic drift) and genetic recombination during a co-infection [13]. Recombination is one of the main driving forces shaping the evolution of viruses, providing a mechanism for generating antigenically novel viruses and, therefore, the ability to evade the immune system [13,14]. In the NoV genome, a recombination hotspot is present near the ORF1/ORF2 junction and a variety of recombinant strains have been detected worldwide [7,13,15–18].

In Brazil, the role of NoV as causative agents of AGE causing outbreaks, sporadic cases, and hospitalization are well documented [19–23]. However, there is a lack of data concerning knowledge of the circulation of NoV recombinant strains in the Brazilian population, since only one report demonstrated a recombinant strain (GII.P7/GII.20) in a community of African descent in northern Brazil [24].

Recently, it was demonstrated the importance of NoV in AGE outbreaks in Southern Brazil, but genotype characterization was performed based only on capsid gene sequences [19]. In the present study, we aimed to investigate the occurrence of recombination in NoV strains associated with AGE outbreaks in the Rio Grande do Sul state (southern region of Brazil) between 2004 and 2011. The recombinant strains were identified by sequence analysis of the ORF1/ORF2 junction region, followed by SimPlot and Bootscan analysis.

## Materials and Methods

### Ethics statement

AGE surveillance is performed through a hierarchical network in which samples are provided by medical request in hospitals and health centers, monitored by the Brazilian Unified Health System (SUS). Fecal samples were collected by the state Central Laboratory and then forwarded to the Laboratory of Comparative and Environmental Virology, Oswaldo Cruz Institute (FIOCRUZ), Ministry of Health. Forms with epidemiological and clinical data accompanied each fecal sample. No patient information was used other than to determine city residence or possible association with outbreaks, and data were maintained anonymously and securely. This study is part of a project that covers diagnosis, surveillance and molecular epidemiology of viruses that cause AGE, approved by the Ethics Committee of FIOCRUZ (CEP No. 311/06).

## Clinical samples

NoV-positive stool samples were collected and analyzed during a retrospective study, as reported previously, that aimed to describe the role of these viruses in causing AGE outbreaks which occurred in the state of Rio Grande do Sul, southern Brazil, in a period of eight years (2004–2011) [19]. For this study, 38 NoV strains representative of outbreaks, 11 GII.4 and 27 non-GII.4, were selected randomly and amplified at the ORF1/ORF2 junction (524nt).

## RNA extraction and cDNA synthesis

Viral RNA was purified from stool samples stored at  $-20^{\circ}\text{C}$ . A 140  $\mu\text{L}$  suspension (10% w/v) of each stool sample was prepared with Tris-calcium buffer ( $\text{pH} = 7.2$ ) and subjected to an automatic RNA extraction procedure using a QIAamp<sup>®</sup> Viral RNA Mini kit (QIAGEN, CA, USA) and a QIAcube<sup>®</sup> automated system (QIAGEN), according to the manufacturer's instructions. Part of the isolated nucleic acid was transcribed to cDNA using a High Capacity cDNA Reverse Transcription Kit (Life Technologies<sup>™</sup>, NY, USA), and an aliquot was immediately stored at  $-80^{\circ}\text{C}$ . In each extraction procedure, RNase/DNase-free water was used as negative control.

## Norovirus genotyping

PCR was performed using primers targeting the ORF1/2 junction region, Mon 431/432 [25] and G2SKR [26], to generate 544 bp amplicons. The reaction was performed in a 50  $\mu\text{L}$  mixture of 10  $\mu\text{L}$  cDNA, 5 U Platinum<sup>®</sup> *Taq* DNA Polymerase (Life Technologies<sup>™</sup>), and 250 nM of each primer. PCR amplification was performed with an initial denaturation at  $95^{\circ}\text{C}$  for 5 min, followed by 40 cycles of denaturation at  $95^{\circ}\text{C}$  for 30 s, annealing at  $50^{\circ}\text{C}$  for 30 s, extension at  $72^{\circ}\text{C}$  for 1 min, and a final extension at  $72^{\circ}\text{C}$  for 10 min. The amplicons obtained were purified using a QIAquick PCR Purification Kit (QIAGEN, Valencia, CA, USA) following the manufacturer's recommendations. For DNA sequencing, the purified products were sent to the FIOCRUZ Institutional Platform for DNA sequencing (PDTIS), performed using an ABI Prism BigDye Terminator Cycle Sequencing Ready Reaction Kit<sup>®</sup> and ABI Prism 3730 Genetic Analyzer (both from Applied Biosystems, Foster City, CA, USA). Following chromatogram analysis, consensual sequences were obtained using BioEdit [27]. Initially, NoV genotypes were assigned using an online genotyping tool (<http://www.rivm.nl/mpf/norovirus/typingtool>) [11] and the strains were named, with the genotype of the polymerase indicated with an uppercase letter p, as proposed by Kroneman et al. [12].

## Recombination analysis

After results were obtained from the genotyping tool, two sequence datasets were constructed, one considering the region coding RdRp (partial ORF1) and the other including the capsid coding region (partial ORF2). Comparable sequences containing ORF1/ORF2 overlap for different NoV genotypes were retrieved from the National Center for Biotechnology Information (NCBI) database. Phylogenetic analysis was performed for both datasets including comparable sequences of different NoV genotypes. Phylogenetic trees were constructed using the neighbor-joining method (Kimura two-parameter model, 2000 bootstrap replications for branch support) in MEGA 6.0 [28]. To further confirm putative recombinant strains and to identify a putative recombination point according with previous reports [13], plot similarity was carried out using SimPlot version 3.5.1 [29]. SimPlot analysis was performed by setting the window width and the step size to 200 bp and 20 bp, respectively. Different methods implemented in the Recombination Detection Program v.4.16 (RDP4) were also used [30], such as Bootscan/Recscan analysis. The sequences obtained in the present study were included as queries, while

putative parental sequences were obtained from the GenBank database, and recombinant strains were confirmed with significant events ( $p < 0.01$ ).

### GenBank accession numbers

The nucleotide sequences obtained in this study were submitted to the NCBI (GenBank, <http://www.ncbi.nlm.nih.gov/>) and received accession numbers KR074148–KR074191.

### Results

NoV recombinant genotypes were characterized in 23 out of 27 (85%) of the non-GII.4 samples, identified by constructing phylogenetic trees of polymerase and capsid genes, and further SimPlot analysis of the ORF1/ORF2 overlap (Figs 1 and 2). NoV recombinant strains were identified as: GII.P7/GII.6 ( $n = 9$ ); GIIP.g/GII.12 ( $n = 4$ ); GII.P16/GII.3 ( $n = 4$ ); GII.Pe/GII.17 ( $n = 2$ ); GII.P7/GII.14 ( $n = 1$ ); GII.P13/GII.17 ( $n = 1$ ); GII.P21/GII.3 ( $n = 1$ ); and GII.P21/GII.13 ( $n = 1$ ) (Table 1).

SimPlot and Bootscan analysis showed recombination breakpoints near the ORF1/2 junction for all samples (Figs 3 and 4). The most detected recombinant type was GII.P7/GII.6, with strains detected in four years (2004, 2007, 2008, and 2010). Among these nine samples, nucleotide identity ranged from 92% to 99%. We performed SimPlot and Bootscan analysis of four GII.P7/GII.6 strains (one sample for each year) and the recombination breakpoints were detected at positions varying from nucleotides 184 to 200, corresponding to nucleotides 5022–

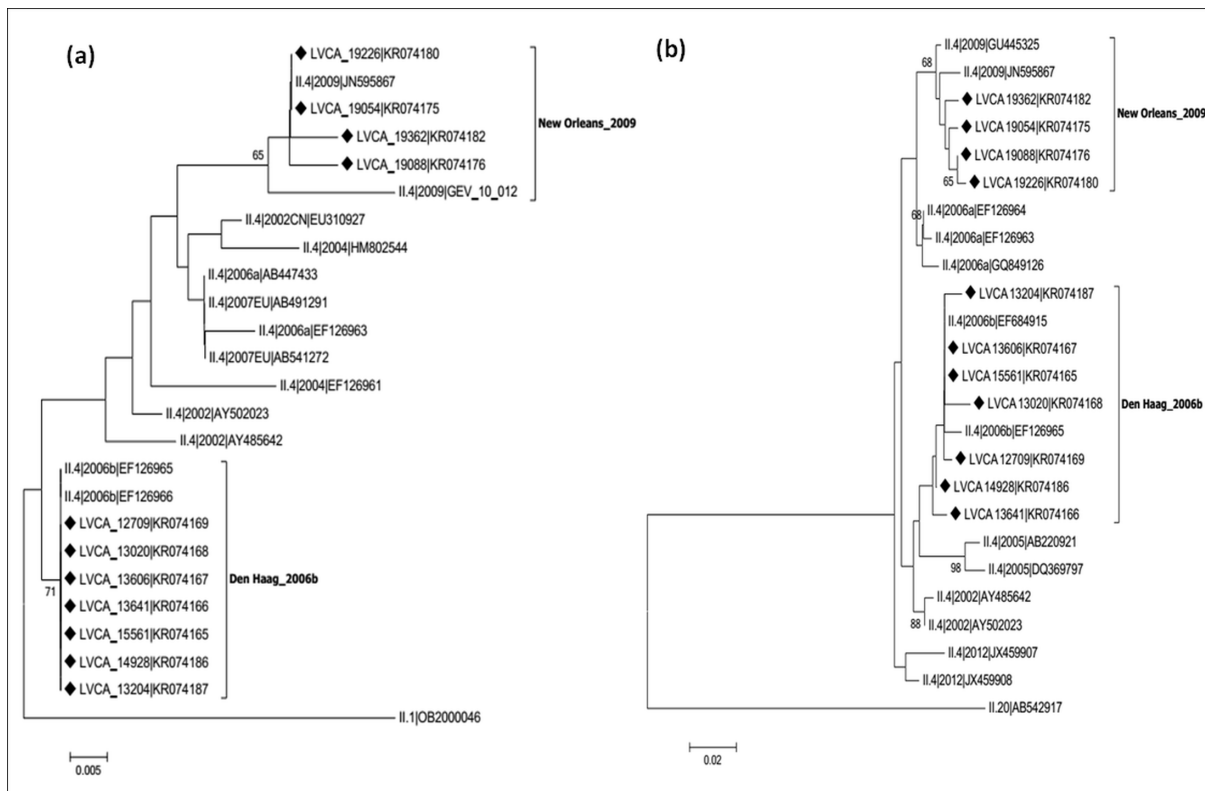

**Fig 1. Phylogenetic analyses of NoV GII.4 sequences based on the polymerase region (ORF1) and capsid region (ORF2).** (a) Phylogenetic tree of 231 bp within the polymerase region (3' ORF1). (b) Phylogenetic tree of 277 bp within the capsid region (5' ORF2). References strains of NoV GII.4 variants are named according to GenBank with their respectively accession numbers. Brazilian GII.4 strains are marked with a filled diamond. The scale bar at the bottom of the tree indicates distance. Bootstrap values (2,000 replicates) are shown at the branch nodes and values lower than 60% are not shown.

doi:10.1371/journal.pone.0145391.g001

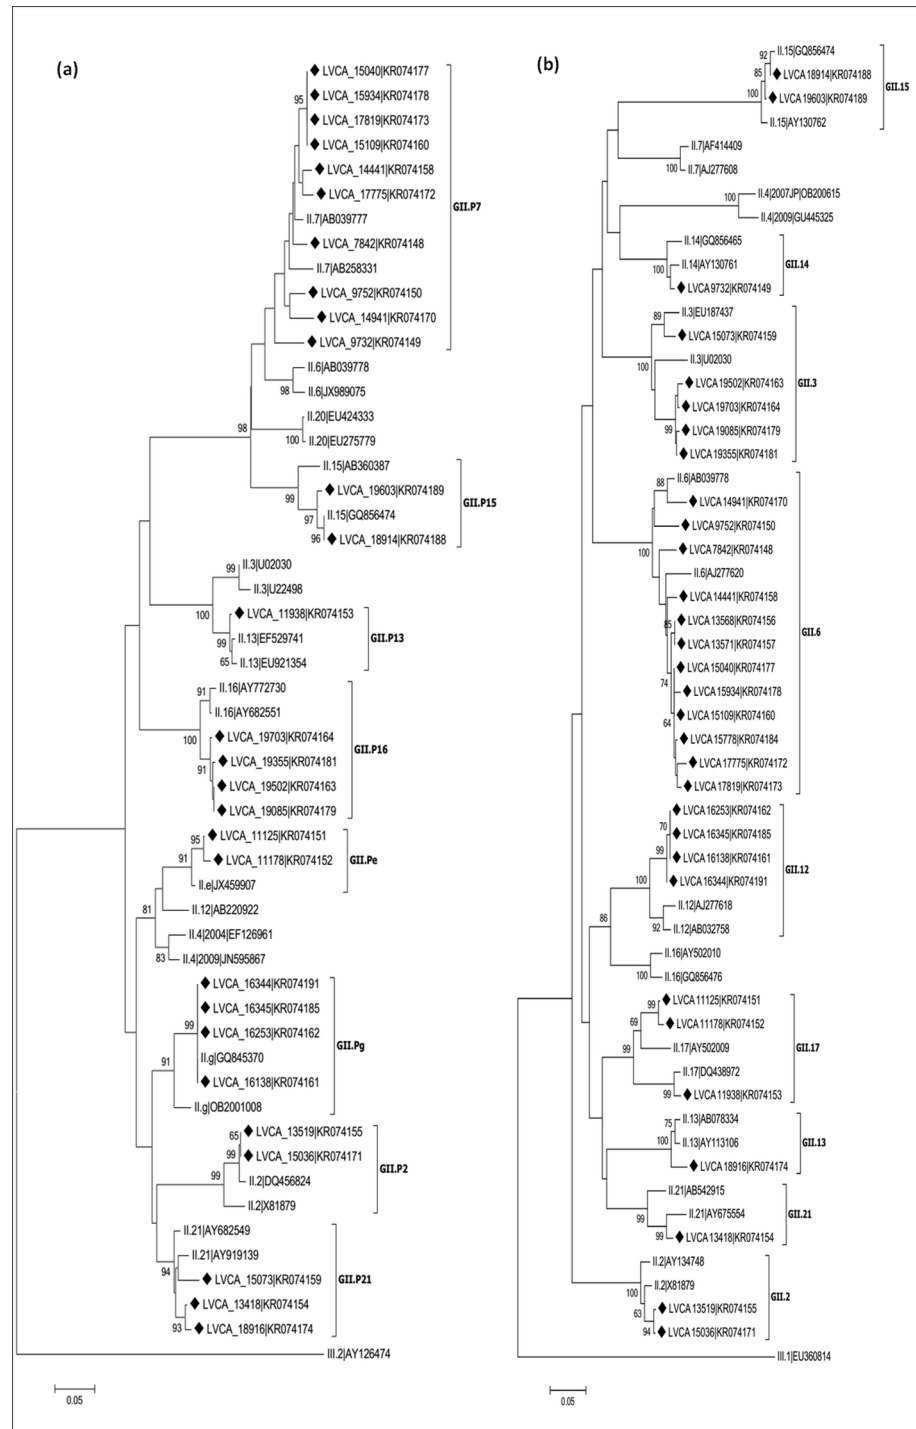

**Fig 2. Phylogenetic analyses of NoV GII sequences based on the polymerase and capsid regions.** (a) Phylogenetic tree of 231 bp within the polymerase region (3'-ORF1). (b) Phylogenetic tree of 277 bp within the capsid region (5'-ORF2). References strains of NoV genotypes are named according to GenBank with their respectively accession numbers. Brazilian GII.4 strains are marked with a filled diamond. The scale bar at the bottom of the tree indicates distance. Bootstrap values (2000 replicates) are shown at the branch nodes and values lower than 60% are not shown.

doi:10.1371/journal.pone.0145391.g002

**Table 1. NoV recombinant sequences detected in Southern Brazil during the period of 2004–2011, with the partial 3'-ORF1 and 5'-ORF2 of NoV genome.**

| Year | Sample identification | Accession number | Acute gastroenteritis outbreak date(month/year) | NoV Genotyping |        | Bootscan <i>p</i> -value  |
|------|-----------------------|------------------|-------------------------------------------------|----------------|--------|---------------------------|
|      |                       |                  |                                                 | ORF1           | ORF2   |                           |
| 2004 | LVCA-7842             | KR074148         | 12/2004                                         | GII.P7         | GII.6  | 6.027 x 10 <sup>-4</sup>  |
|      | LVCA-9732             | KR074149         | 09/2004                                         | GII.P7         | GII.14 | 3.610 x 10 <sup>-4</sup>  |
|      | LVCA-9752             | KR074150         | 09/2004                                         | GII.P7         | GII.6  | 9.343 x 10 <sup>-3</sup>  |
| 2005 | LVCA-11125            | KR074151         | 08/2005                                         | GII.Pe         | GII.17 | 4.141 x 10 <sup>-5</sup>  |
|      | LVCA-11178            | KR074152         | 09/2005                                         | GII.Pe         | GII.17 | 6.426 x 10 <sup>-5</sup>  |
| 2006 | LVCA-11938            | KR074153         | 03/2006                                         | GII.P13        | GII.17 | 8.085 x 10 <sup>-9</sup>  |
| 2007 | LVCA-14441            | KR074158         | 10/2007                                         | GII.P7         | GII.6  | 7.127 x 10 <sup>-4</sup>  |
| 2008 | LVCA-14941            | KR074170         | 04/2008                                         | GII.P7         | GII.6  | 8.509 x 10 <sup>-4</sup>  |
|      | LVCA-15040            | KR074177         | 04/2008                                         | GII.P7         | GII.6  | 2.093 x 10 <sup>-5</sup>  |
|      | LVCA-15073            | KR074159         | 04/2008                                         | GII.P21        | GII.3  | 8.195 x 10 <sup>-7</sup>  |
|      | LVCA-15109            | KR074160         | 05/2008                                         | GII.P7         | GII.6  | 2.807 x 10 <sup>-4</sup>  |
|      | LVCA-15934            | KR074178         | 11/2008                                         | GII.P7         | GII.6  | 5.513 x 10 <sup>-5</sup>  |
| 2009 | LVCA-16138            | KR074161         | 01/2009                                         | GII.Pg         | GII.12 | 1.680 x 10 <sup>-4</sup>  |
|      | LVCA-16253            | KR074162         | 03/2009                                         | GII.Pg         | GII.12 | 1.255 x 10 <sup>-4</sup>  |
|      | LVCA-16344            | KR074191         | 04/2009                                         | GII.Pg         | GII.12 | 8.017 x 10 <sup>-5</sup>  |
|      | LVCA-16345            | KR074185         | 04/2009                                         | GII.Pg         | GII.12 | 3.012 x 10 <sup>-4</sup>  |
| 2010 | LVCA-17775            | KR074172         | 03/2010                                         | GII.P7         | GII.6  | 5.943 x 10 <sup>-4</sup>  |
|      | LVCA-17819            | KR074173         | 03/2010                                         | GII.P7         | GII.6  | 1.242 x 10 <sup>-4</sup>  |
|      | LVCA-18916            | KR074174         | 09/2010                                         | GII.P21        | GII.13 | 7.077 x 10 <sup>-11</sup> |
|      | LVCA-19085            | KR074179         | 11/2010                                         | GII.P16        | GII.3  | 8.609 x 10 <sup>-11</sup> |
| 2011 | LVCA-19355            | KR074181         | 01/2011                                         | GII.P16        | GII.3  | 4.847 x 10 <sup>-10</sup> |
|      | LVCA-19502            | KR074163         | 01/2011                                         | GII.P16        | GII.3  | 7.580 x 10 <sup>-11</sup> |
|      | LVCA-19703            | KR074164         | 03/2011                                         | GII.P16        | GII.3  | 8.050 x 10 <sup>-10</sup> |

doi:10.1371/journal.pone.0145391.t001

5038 in relation to the reference strain Lordsdale (accession number X86557), localized in the ORF1/2 junction. The location of the recombination breakpoint, near the ORF junction, was similar in all recombinant samples (Figs 3 and 4).

The recombinant types GII.Pe/GII.17 and GII.Pg/GII.12 were detected only in 2005 and 2009, respectively. The four detected samples characterized as GII.Pg/GII.12 showed a high nucleotide identity (> 99%), and were detected in the months of January, March and April. Both ORF1 and ORF2 genotypes of the two samples GII.Pe/GII.17 clustered together in the phylogenetic tree with a nucleotide identity of 99% in the region analyzed. Interestingly, the recombinant GII.P13/GII.17, detected in the following year, has an ORF2 genotype grouped in a separate cluster compared with the sample GII.Pe/GII.17. Samples belonging to the recombinant GII.P16/GII.3 were detected in 2010 and 2011, with genotypes characterized from both regions grouping in the same cluster. The sample LVCA\_15073 (GII.P21/GII.3) presented distinct genotypes (both ORF1 and ORF2) that grouped in a separate cluster, when compared with samples GII.P21/GII.13 and GII.P16/GII.3. The four NoV non-recombinant samples were genotyped as GII.P2/GII.2 (n = 2), and GII.P15/GII.15 (n = 2) (Fig 2).

Concerning the 11 NoV GII.4 strains analyzed, no recombination type was identified. GII.4 variants detected were Den Haag\_2006b and New Orleans\_2009, in both regions analyzed (3'-ORF1 and 5'-ORF2) (Fig 2). These GII.4 samples were detected from 2006 to 2011, and strains shared nucleotide sequence identities between 95% and 99%. Samples belonging to the Den

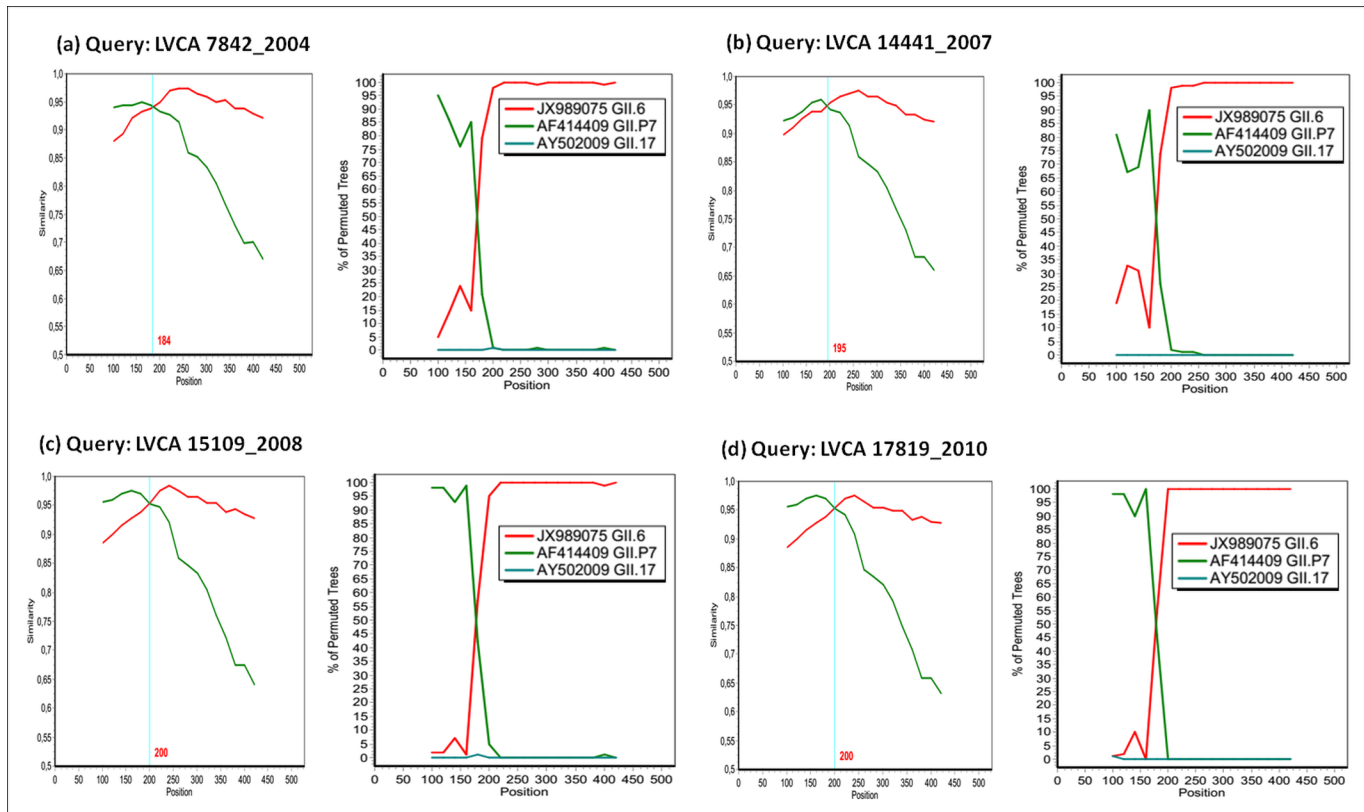

**Fig 3. Simplot and Bootscan analyses of the NoV recombinant GII.P7/GII.6 detected in four different years.** (a) LVCA7842, (b) LVCA14441, (c) LVCA15109, and (d) LVCA17819. For similarity plot, the y-axis gives the percentage of identity within a sliding window of 200 bp wide, with a step size between plots of 20 bp. The site where the two NoV parental strains of genotypes GII.6 (JX989075) and GII.7 (AF414409) have equal identity to the recombinant (crossed by the vertical blue lines) is the predicted site of recombination. For Bootscan, the y-axis gives the percentage of bootstrap support values of permuted trees using a sliding window of 200 bp wide with a step size between plots of 20 bp. GII.17 strain (AY502009) was used as an outlier sequence.

doi:10.1371/journal.pone.0145391.g003

Haag\_2006b variant were collected for three years (2006–2008), and samples belonging to the New Orleans\_2009 variant were detected in 2010 and 2011. Among samples of both variant groups, nucleotide sequence identities ranged from 98% to 99%.

## Discussion

For the first time in Brazil, we are reporting eight different NoV recombinant strains responsible for AGE outbreaks in the southern region from 2004 to 2011. We observed a high prevalence of NoV recombinant strains (85%) among the non-GII.4 samples analyzed.

Genetic recombination is a widespread phenomenon in NoV, which has a major impact on their evolution and genotype diversity, and has been associated with the emergence of new genotypes. As most NoV recombination occurs in a single hotspot breakpoint located in the ORF1/ORF2 overlap [13,31], a combined characterization of both the polymerase and capsid regions is important to monitor new NoV genotype emergence and recombinant strains [32–35]. Our results emphasize the importance of including the characterization of both regions in surveillance studies since it is probable that the real magnitude of NoV recombination is underestimated in other Brazilian regions and equally in other countries.

The GII.P7/GII.6 was the most frequent recombinant and, unlike the other detected recombinant strains, had a long period of circulation (2004–2010). The GII.P7 genotype was associated with the GII.14 capsid genotype in 2004. In a study performed in a semi-closed

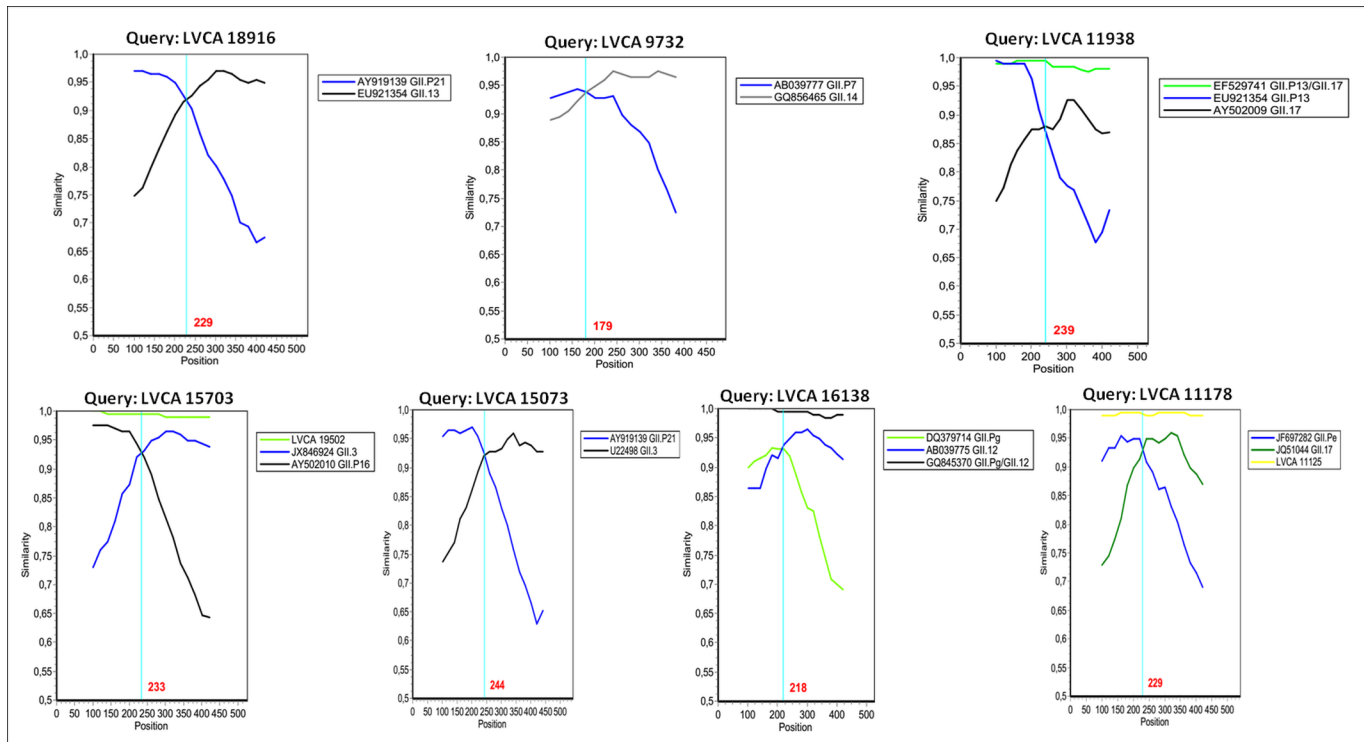

**Fig 4. Similarity plots of the NoV recombinant types detected in Southern Brazil during the 2004–2011 period.** SimPlot was constructed using Simplot version 3.5.1 with a slide window width of 200 bp and a step size of 20 bp. The vertical axis indicates nucleotide identities (%) between the query sequences (Brazilian samples) and the reference strains. NoV parental strains are indicated by the accession numbers and their respectively ORF1-based genotypes (indicated by the letter P) or ORF2-based genotypes.

doi:10.1371/journal.pone.0145391.g004

community of African descent in northern Brazil in 2008, GII.P7 was described as a recombinant GII.P7/GII.20 detected in a stool sample of a child with NoV-associated gastroenteritis [24]. Also in Brazil, the NoV genotype GII.6 was detected in southeastern and northeastern regions in 2003–2005 and 2007–2008 [36–38]. This recombinant type (GII.P7/GII.6) was first described in 2011 in Burkina Faso [39]. GII.P7/GII.6 recombinants were also reported in other countries such as Italy, Finland, China, and South Africa [34,40–44]. In South America, this recombinant was reported between 2011 and 2012, in diarrhetic stool and vomit samples from Uruguayan patients [35]. Due to the high nucleotide similarity between the Uruguayan and Brazilian samples (93%–97%), and taking into account that the Brazilian state of Rio Grande do Sul borders Uruguay, it is possible that the same recombinant strain has circulated in both countries.

The recombinant GII.Pg/GII.12 was the second most frequent found in the present study, although it was detected only in 2009. In that same year in Brazil, the genotype GII.12 was observed circulating in two different regions: northeastern and southeastern [37]; however, as the polymerase genotype was not characterized, we cannot affirm that these samples share the same genetic recombination type. The recombinant GII.Pg/GII.12 was described for the first time in Australia in 2008, from sporadic AGE cases, and in the same year causing outbreaks in New Zealand [33]. In the period 2009–2010, the recombinant GII.Pg/GII.12 had spread worldwide, and was mainly associated with AGE outbreaks [18,31,41,45–49]. As stated by Sang et al., the global spread of GII.Pg/GII.12 strains could be associated with their high evolution rates compared to rates observed for GII.4 [32]. In 2012, this recombinant was reported for the first time in the African continent [34].



Here, we also detected the capsid genotype GII.17 associated with two distinct genotypes, GII.Pe ( $n = 2$ ) and GIIP.13 ( $n = 1$ ) in 2005 and 2006, respectively. As they were grouped in a separate phylogenetic cluster, this could indicate that two lineages of the GII.17 genotype may be circulating in Brazil. The genotype GII.17 was also detected in northern Brazil in 2005 and 2009 in the states of Acre and Pará, respectively [22,37]. Globally, GII.Pe has been described as a recombinant in association with other capsid genotypes such as: GII.2, GII.3, GII.4 and GII.12 [33,40,47]. In 2012, the emergence of the new pandemic NoV GII.4 variant Sydney\_2012 as a recombinant form (GII.Pe/GII.4) was reported, which led to an increase in NoV activity and associated AGE epidemics in countries including Australia, New Zealand, France, Japan, China and the United States [17,50–52]. The emergence of the pandemic GII.4 variant, which originated from genome recombination, highlights the significance of an antigenic shift on NoV evolution. The capsid genotype GII.17 is described as a recombinant strain in association with the most common GII.P13 ORF1 genotype, although other recombinant forms have been identified such as GII.P16, GII.P3 and GII.P4 [53]. The two samples characterized as recombinant GII.Pe/GII.17 could represent the first description of this recombinant strain.

Another recombinant strain detected in this study was GII.P16/GII.3, found in 2010 and 2011. In the same period, this recombinant was detected for the first time in Bangladesh, India and Italy [40,54]. The capsid genotype GII.3 was the second most frequent detected during a surveillance study carried out in southeastern Brazil in 2003–2004 [38]. In our study, the GII.3 capsid genotype was also detected as a recombinant strain associated with GII.P21 in 2008, but samples were grouped into different genetic clusters according to their polymerase genotypes. Both recombinant strains were also detected in Spain between 2009 and 2012, with GII.P21/GII.3 and GII.P16/GII.3 corresponding to 28.4% and 18.5% of all recombinant strains characterized, respectively [18].

In conclusion, we demonstrated the high diversity of recombinant strains causing AGE outbreaks in southern Brazil in 2004–2011, which represented the main percentage (85%) of non-GII.4 NoV. These data are in agreement with data obtained from a study conducted in Singapore, where only GII.6 and GII.7 capsid genotypes were non-recombinant viruses of all the non-GII.4 strains detected [49]. Our data show that the circulation of NoV recombinant strains is common in southern Brazil, with real potential ability to cause AGE outbreaks. The great diversity and the high frequency of recombinants circulating in our country demonstrates the importance of ongoing surveillance to understand the role of these recombinant strains in the dynamic of NoV infections. Inter or intra-genotype recombination allows increased fitness and viral evolution, enabling NoV to escape and spread in a susceptible population, with direct implications in NoV-infections incidence and for design of an effective vaccine. Therefore, the appropriate characterization of NoV strains is fundamental for performing an adequate epidemiological surveillance, highlighting the importance of a combined ORF1/ORF2 characterization to access the circulation and genetic diversity of NoV recombinant strains worldwide.

## Acknowledgments

The authors thank the staff of the Central Laboratory of Rio Grande do Sul state (LACEN, RS) for sending the clinical specimens.

## Author Contributions

Conceived and designed the experiments: TMF JSRA JPGL MPM. Performed the experiments: TMF JSRA. Analyzed the data: TMF JSRA JPGL MPM. Contributed reagents/materials/analysis tools: TMF JSRA JPGL MPM. Wrote the paper: TMF JSRA JPGL MPM.

## References

1. Atmar RL, Estes MK (2006) The epidemiologic and clinical importance of norovirus infection. *Gastroenterol Clin North Am* 35:275–90. PMID: [16880066](#)
2. Glass RI, Parashar UD, Estes MK (2009) Norovirus Gastroenteritis. *N Engl J Med* 361:1776–85. doi: [10.1056/NEJMra0804575](#) PMID: [19864676](#)
3. Hall AJ, Wikswø ME, Manikonda K, Roberts VA, Yoder JS, Gould LH (2013) Acute gastroenteritis surveillance through the National Outbreak Reporting System, United States. *Emerg Infect Dis* 19:1305–9. doi: [10.3201/eid1908.130482](#) PMID: [23876187](#)
4. Siebenga JJ, Vennema H, Zheng DP, Vinjé J, Lee BE, Pang XL, et al. (2009) Norovirus illness is a global problem: emergence and spread of norovirus GII.4 variants, 2001–2007. *J Infect Dis* 200:802–812. doi: [10.1086/605127](#) PMID: [19627248](#)
5. Vega E, Barclay L, Gregoricus N, Shirley SH, Lee D, Vinjé J (2014) Genotypic and epidemiologic trends of norovirus outbreaks in the United States, 2009 to 2013. *J Clin Microbiol* 52:147–55. doi: [10.1128/JCM.02680-13](#) PMID: [24172151](#)
6. Xi JN, Graham DY, Wang KN, Estes MK (1990) Norwalk virus genome cloning and characterization. *Science* 4:1580–3.
7. Bull RA, Hansman GS, Clancy LE, Tanaka MM, Rawlinson WD, White PA (2005) Norovirus recombination in ORF1/ORF2 overlap. *Emerg Infect Dis* 11:1079–85. PMID: [16022784](#)
8. Green K. Caliciviridae: the noroviruses. In: Knipe DM, Howley PM, Griffin DE, Lamb RA, Martin MA, Roizman B, et al., editors. *Fields virology*, 5th ed. Philadelphia: Lippincott Williams & Wilkins. p.949–79.
9. Zheng DP, Ando T, Fankhauser RL, Beard RS, Glass RI, Monroe SS (2006) Norovirus classification and proposed strain nomenclature. *Virology* 346:312–23. PMID: [16343580](#)
10. Mesquita JR, Barclay L, Nascimento MS, Vinje J (2010) Novel norovirus in dogs with diarrhea. *Emerg Infect Dis* 16:980–982. doi: [10.3201/eid1606.091861](#) PMID: [20507751](#)
11. Kroneman A, Vennema H, Deforche K, Avoort HV, Peñaranda S, Oberste MS, et al. (2011) An automated genotyping tool for enteroviruses and noroviruses. *J Clin Virol* 51:121–5. doi: [10.1016/j.jcv.2011.03.006](#) PMID: [21514213](#)
12. Kroneman A, Vega E, Vennema H, Vinjé J, White PA, Hansman G, et al. (2013) Proposal for a unified norovirus nomenclature and genotyping. *Arch Virol* 158:2059–68. doi: [10.1007/s00705-013-1708-5](#) PMID: [23615870](#)
13. Bull RA, Tanaka MM, White PA (2007) Norovirus recombination. *J Gen Virol* 88:3347–59. PMID: [18024905](#)
14. White PA (2014) Evolution of norovirus. *Clin Microbiol Infect* 20:741–5. doi: [10.1111/1469-0691.12746](#) PMID: [24980204](#)
15. Chhabra P, Walimbe AM, Chitambar SD (2010) Molecular characterization of three novel intergenotype norovirus GII recombinant strains from western India. *Virus Res* 147:242–246. doi: [10.1016/j.virusres.2009.11.007](#) PMID: [19941918](#)
16. Mahar JE, Kirkwood CD (2011) Characterization of norovirus strains in Australian children from 2006 to 2008: prevalence of recombinant strains. *J Med Virol* 83:2213–2219. doi: [10.1002/jmv.22215](#) PMID: [22012731](#)
17. Eden JS, Tanaka MM, Boni MF, Rawlinson WD, White PA (2013) Recombination within the pandemic norovirus GII.4 lineage. *J Virol* 87:6270–82. doi: [10.1128/JVI.03464-12](#) PMID: [23536665](#)
18. Arana A, Cilla G, Montes M, Gomariz M, Pérez-Trallero E (2014) Genotypes, recombinant forms, and variants of norovirus GII.4 in Gipuzkoa (Basque Country, Spain), 2009–2012. *PLoS One* 9:e98875. doi: [10.1371/journal.pone.0098875](#) PMID: [24893307](#)
19. Andrade JSR, Rocha MS, Carvalho-Costa FA, Fioretti JM, Xavier Mda P, Nunes ZM, et al. (2014) Noroviruses associated with outbreaks of acute gastroenteritis in the State of Rio Grande do Sul, Brazil, 2004–2011. *J Clin Virol* 61:345–52. doi: [10.1016/j.jcv.2014.08.024](#) PMID: [25223919](#)
20. Fioretti JM, Bello G, Rocha MS, Victoria M, Leite JP, Miagostovich MP (2014) Temporal dynamics of norovirus GII.4 variants in Brazil between 2004 and 2012. *PLoS One* 25:e92988.
21. Fumian TM, Justino MC, D'Arc Pereira Mascarenhas J, Reymão TK, Abreu E, Soares L, et al. (2013) Quantitative and molecular analysis of noroviruses RNA in blood from children hospitalized for acute gastroenteritis in Belém, Brazil. *J Clin Virol* 58:31–5. doi: [10.1016/j.jcv.2013.06.043](#) PMID: [23886502](#)
22. Aragão GC, Mascarenhas JD, Kaiano JH, de Lucena MS, Siqueira JA, Fumian TM, et al. (2013) Norovirus diversity in diarrheic children from an African-descendant settlement in Belém, Northern Brazil. *PLoS One* 8:e56608. doi: [10.1371/journal.pone.0056608](#) PMID: [23457593](#)

23. Lemes LG, Corrêa TS, Fiaccadori FS, Cardoso Dd, Arantes Ade M, Souza KM, et al. (2014) Prospective study on Norovirus infection among allogeneic stem cell transplant recipients: prolonged viral excretion and viral RNA in the blood. *Clin Virol* 61:329–33.
24. Fumian TM, Aragão GC, Mascarenhas JD, Kaiano JH, Siqueira JA, Soares LS, et al. (2012) Detection of a novel recombinant strain of norovirus in an African-descendant community from the Amazon region of Brazil in 2008. *Arch Virol* 157:2389–92. doi: [10.1007/s00705-012-1428-2](https://doi.org/10.1007/s00705-012-1428-2) PMID: [22872050](https://pubmed.ncbi.nlm.nih.gov/22872050/)
25. Beuret C, Kohler D, Baumgartner A, Lüthi TM. Norwalk-like viruses sequences in mineral waters: one-year monitoring of three brands (2002) *Apl Environ Microbiol* 68: 1925–31.
26. Kojima S, Kaheyama T, Fukushi S, Hoshino FB, Shinohara M, Uchida K, et al. (2002) Genogroup-specific PCR primers for detection of Norwalk-like viruses. *J Vir Methods* 100: 107–14.
27. Hall TA (1999) BioEdit: a user-friendly biological sequence alignment editor and analysis program for Windows 95/98/NT. *Nucl Acids Symp Ser* 41:95–98.
28. Tamura K, Stecher G, Peterson D, Filipinski A, Kumar S (2013) MEGA6: Molecular Evolutionary Genetics Analysis version 6.0. *Mol Biol Evol* 30:2725–9. doi: [10.1093/molbev/mst197](https://doi.org/10.1093/molbev/mst197) PMID: [24132122](https://pubmed.ncbi.nlm.nih.gov/24132122/)
29. Lole KS, Bollinger RC, Paranjape RS, Gadkari D, Kulkarni SS, Novak NG, et al. (1999) Fulllength human immunodeficiency virus type 1 genomes from subtype C-infected seroconverters in India, with evidence of intersubtype recombination. *J Virol* 73:152–160. PMID: [9847317](https://pubmed.ncbi.nlm.nih.gov/9847317/)
30. Martin DP, Murrell B, Golden M, Khoosal A, Muhire B (2015) RDP4: Detection and analysis of recombination patterns in virus genomes. *Virus Evolution* 1: vev003.
31. Sang S, Zhao Z, Suo J, Xing Y, Jia N, Gao Y, et al. (2014) Report of recombinant norovirus GII.g/GII.12 in Beijing, China. *PLoS One* 9:e88210. doi: [10.1371/journal.pone.0088210](https://doi.org/10.1371/journal.pone.0088210) PMID: [24505432](https://pubmed.ncbi.nlm.nih.gov/24505432/)
32. Giammanco GM, Rotolo V, Medici MC, Tummolo F, Bonura F, Chezzi C, et al. (2012) Recombinant norovirus GII.g/GII.12 gastroenteritis in children. *Infect Genet Evol* 12:169–74. doi: [10.1016/j.meegid.2011.10.021](https://doi.org/10.1016/j.meegid.2011.10.021) PMID: [22067516](https://pubmed.ncbi.nlm.nih.gov/22067516/)
33. Eden JS, Bull RA, Tu E, McIver CJ, Lyon MJ, Marshall JA, et al. (2010). Norovirus GII.4 variant 2006b caused epidemics of acute gastroenteritis in Australia during 2007 and 2008. *J Clin Virol* 49:265–271. doi: [10.1016/j.jcv.2010.09.001](https://doi.org/10.1016/j.jcv.2010.09.001) PMID: [20888289](https://pubmed.ncbi.nlm.nih.gov/20888289/)
34. Mans J, Murray TY, Taylor MB (2014) Novel norovirus recombinants detected in South Africa. *Virol J* 11:168. doi: [10.1186/1743-422X-11-168](https://doi.org/10.1186/1743-422X-11-168) PMID: [25228444](https://pubmed.ncbi.nlm.nih.gov/25228444/)
35. Fajardo Á, Tort FL, Victoria M, Fumian TM, Miagostovich MP, Leite JP, et al. (2014) Phylogenetic analyses of Norovirus strains detected in Uruguay reveal the circulation of the novel GII.P7/GII.6 recombinant variant. *Infect Genet Evol* 28:328–32. doi: [10.1016/j.meegid.2014.10.026](https://doi.org/10.1016/j.meegid.2014.10.026) PMID: [25445648](https://pubmed.ncbi.nlm.nih.gov/25445648/)
36. Ferreira MS, Xavier Mda P, Tinga AC, Rose TL, Fumian TM, Fialho AM, et al. (2012) Assessment of gastroenteric viruses frequency in a children's day care center in Rio De Janeiro, Brazil: a fifteen year study (1994–2008). *PLoS One* 7:e33754. doi: [10.1371/journal.pone.0033754](https://doi.org/10.1371/journal.pone.0033754) PMID: [22448271](https://pubmed.ncbi.nlm.nih.gov/22448271/)
37. Fioretti JM, Ferreira MS, Victoria M, Vieira CB, Xavier Mda P, Leite JP, et al. (2011) Genetic diversity of noroviruses in Brazil. *Mem Inst Oswaldo Cruz* 106:942–47. PMID: [22241115](https://pubmed.ncbi.nlm.nih.gov/22241115/)
38. Barreira DM, Ferreira MS, Fumian TM, Checon R, de Sadovsky AD, Leite JP, et al. (2010) Viral load and genotypes of noroviruses in symptomatic and asymptomatic children in Southeastern Brazil. *J Clin Virol* 47:60–4. doi: [10.1016/j.jcv.2009.11.012](https://doi.org/10.1016/j.jcv.2009.11.012) PMID: [20004146](https://pubmed.ncbi.nlm.nih.gov/20004146/)
39. Huynen P, Mauroy A, Martin C, Savadogo LG, Boreux R, Thiry E, et al. (2013) Molecular epidemiology of norovirus infections in symptomatic and asymptomatic children from Bobo Dioulasso, Burkina Faso. *J Clin Virol* 58:515–521. doi: [10.1016/j.jcv.2013.08.013](https://doi.org/10.1016/j.jcv.2013.08.013) PMID: [24029685](https://pubmed.ncbi.nlm.nih.gov/24029685/)
40. Medici MC, Tummolo F, Martella V, Giammanco GM, De Grazia S, Arcangeletti MC, et al. (2014) Novel recombinant GII.P16\_GII.13 and GII.P16\_GII.3 norovirus strains in Italy. *Virus Res* 188:142–5. doi: [10.1016/j.virusres.2014.04.005](https://doi.org/10.1016/j.virusres.2014.04.005) PMID: [24751799](https://pubmed.ncbi.nlm.nih.gov/24751799/)
41. Puustinen L, Blazevic V, Salminen M, Hamalainen M, Rasanen S, Vesikari T (2011) Noroviruses as a major cause of acute gastroenteritis in children in Finland, 2009–2010. *Scand J Infect Dis* 43:804–808. doi: [10.3109/00365548.2011.588610](https://doi.org/10.3109/00365548.2011.588610) PMID: [21696253](https://pubmed.ncbi.nlm.nih.gov/21696253/)
42. Wu X, Han J, Chen L, Xu D, Shen Y, Zha Y, et al. (2015) Prevalence and genetic diversity of noroviruses in adults with acute gastroenteritis in Huzhou, China, 2013–2014. *Arch Virol* 160:1705–13. doi: [10.1007/s00705-015-2440-0](https://doi.org/10.1007/s00705-015-2440-0) PMID: [25951970](https://pubmed.ncbi.nlm.nih.gov/25951970/)
43. Yu Y, Yan S, Li B, Pan Y, Wang Y (2014) Genetic diversity and distribution of human norovirus in China (1999–2011). *Biomed Res Int* 2014:196169. doi: [10.1155/2014/196169](https://doi.org/10.1155/2014/196169) PMID: [24672783](https://pubmed.ncbi.nlm.nih.gov/24672783/)
44. Zeng M, Gong Z, Zhang Y, Zhu Q, Wang X (2011) Prevalence and genetic diversity of norovirus in outpatient children with acute diarrhea in Shanghai, China. *Jpn J Infect Dis* 64:417–422. PMID: [21937824](https://pubmed.ncbi.nlm.nih.gov/21937824/)

45. Takanashi S, Wang Q, Chen N, Shen Q, Jung K, Zhang Z, et al. (2011) Characterization of emerging GII.g/GII.12 noroviruses from a gastroenteritis outbreak in the United States in 2010. *J Clin Microbiol* 49: 3234–3244. doi: [10.1128/JCM.00305-11](https://doi.org/10.1128/JCM.00305-11) PMID: [21752978](https://pubmed.ncbi.nlm.nih.gov/21752978/)
46. Vega E, Vinje J (2011) Novel GII.12 norovirus strain, United States, 2009–2010. *Emerg Infect Dis* 17:1516–1518. doi: [10.3201/eid1708.110025](https://doi.org/10.3201/eid1708.110025) PMID: [21801639](https://pubmed.ncbi.nlm.nih.gov/21801639/)
47. Mathijs E, Denayer S, Palmeira L, Botteldoorn N, Scipioni A, Vanderplasschen A, et al. (2011) Novel norovirus recombinants and of GII.4 sub-lineages associated with outbreaks between 2006 and 2010 in Belgium. *Virology* 8: 310. doi: [10.1186/1743-422X-8-310](https://doi.org/10.1186/1743-422X-8-310) PMID: [21682917](https://pubmed.ncbi.nlm.nih.gov/21682917/)
48. Han TH, Kim CH, Chung JY, Park SH, Hwang ES (2011) Emergence of norovirus GII-4/2008 variant and recombinant strains in Seoul, Korea. *Arch Virol* 156:323–9. doi: [10.1007/s00705-010-0844-4](https://doi.org/10.1007/s00705-010-0844-4) PMID: [21053029](https://pubmed.ncbi.nlm.nih.gov/21053029/)
49. Lim KL, Eden JS, Oon LL, White PA (2013) Molecular epidemiology of norovirus in Singapore, 2004–2011. *J Med Virol* 85:1842–51. doi: [10.1002/jmv.23669](https://doi.org/10.1002/jmv.23669) PMID: [23868077](https://pubmed.ncbi.nlm.nih.gov/23868077/)
50. van Beek J, Ambert-Balay K, Botteldoorn N, Eden JS, Fonager J, Hewitt J, et al. (2013) NoroNet. Indications for worldwide increased norovirus activity associated with emergence of a new variant of genotype II.4, late 2012. *Euro Surveill* 18:8–9. PMID: [23305715](https://pubmed.ncbi.nlm.nih.gov/23305715/)
51. Chan MC1, Chan PK (2013) Complete Genome Sequence of a Novel Recombinant Human Norovirus Genogroup II Genotype 4 Strain Associated with an Epidemic during Summer of 2012 in Hong Kong. *Genome Announc* 1pii: e00140–12.
52. Centers for Disease Control and Prevention (CDC) (2013) Surveillance for foodborne disease outbreaks—United States, 2009–2010. *MMWR Morb Mortal Wkly Rep* 25; 62(3): 41–7.
53. de Graaf M, van Beek J, Vennema H, Podkolzin AT, Hewitt J, Bucardo F, et al. (2015) Emergence of a novel GII.17 norovirus—End of the GII.4 era? *Euro Surveill* 20: 21178. PMID: [26159308](https://pubmed.ncbi.nlm.nih.gov/26159308/)
54. Nahar S, Afrad MH, Matthijssens J, Rahman MZ, Momtaz Z, Yasmin R, et al. (2013) Novel intergenotype human norovirus recombinant GII.16/GII.3 in Bangladesh. *Infect Genet Evol* 20:325–9. doi: [10.1016/j.meegid.2013.09.021](https://doi.org/10.1016/j.meegid.2013.09.021) PMID: [24080167](https://pubmed.ncbi.nlm.nih.gov/24080167/)
